# Supplementary material for: Beneficial Effects of Olive Oil Enriched with Lycopene on the Plasma Antioxidant and Anti-Inflammatory Profile of Hypercholesterolemic Patients
Source: MDPI journal article supplement (doi:10.3390/antiox12071458), 2023-07-20
Supplement: s1 [file s1]

**Supplemented 1. Composition (%) of to3mato extract-olive oil in each container of 20 mL**

|                          | <b>Olive oil-tomato extract</b> |
|--------------------------|---------------------------------|
| Lycopene (%)             | 0.05                            |
| Beta-carotene (%)        | 0.005                           |
| Phytosterols (%)         | 0.16                            |
| Oleic acid (%)           | 71.62                           |
| Tocopherols (%)          | 0.04                            |
| Phytoene/phytofluene (%) | 0.01                            |
| Tomatoes oil (%)         | 0.58                            |
| Linoleic acid (%)        | 9.29                            |
| Linolenic acid (%)       | 1.07                            |
| Gadoleic acid (%)        | 0.26                            |
| Palmitoleic acid (%)     | 1.03                            |
| Palmitic acid (%)        | 11.9                            |
| Margaroleic (%)          | 0.14                            |
| Arachidic acid (%)       | 0.47                            |
| Phospholipids (%)        | 0.07                            |
| Stearic acid (%)         | 3.24                            |
| Antioxidant capacity     |                                 |
| ABTS (mM Trolox)         | 3.21 ± 0.032                    |
| DPPH (mM Trolox)         | 670 ± 68                        |
| FRAP (mM)                | 0.826 ± 0.05                    |
| Antiradical capacity     |                                 |
| HRSA (% inhibition)      | 91.1 ± 0.90                     |
| SRSA (% inhibition)      | 42.6 ± 10.1                     |

**Supplemented 2. Characteristics of the study subjects at the beginning of study**

|                   | <b>Females (n=25)</b> | <b>Males (n=55)</b> |
|-------------------|-----------------------|---------------------|
| Age (y)           | 58±13                 | 61± 12              |
| Energy (Kcal)     | 1865 ± 442            | 2013 ± 168          |
| Carbohydrates (g) | 166 ± 54              | 168 ± 45            |
| Protein (g)       | 65 ± 20               | 97 ± 20             |
| Fiber (g)         | 17.8 ± 6.8            | 15.7 ± 4.7          |
| Cholesterol (mg)  | 371 ± 109             | 377 ± 90            |
| Fatty acids       |                       |                     |
| SFA               | 33.7 ± 23.3           | 26.3 ± 8.3          |
| MUFAs             | 50.6 ± 32.9           | 45.4 ± 11.8         |
| PUFAs             | 15.8 ± 13.4           | 12.2 ± 3.8          |
| Vitamin B12 (µg)  | 5.7 ± 2.1             | 6.2 ± 2.2           |
| Vitamin C (mg)    | 148.2 ± 71.9          | 109.3 ± 41.8        |
| Vitamin D (µg)    | 10.4 ± 10.7           | 4.07 ± 5.55         |
| Folic acid (µg)   | 508 ± 276             | 240 ± 107           |
| Calcium (mg)      | 848 ± 288             | 753 ± 287           |
| Magnesium (mg)    | 273 ± 73              | 261 ± 71            |
| Fe (mg)           | 12.4 ± 3.8            | 12.3 ± 3.0          |
